# Supplementary material for: Improving the performance of an anionic MOF by counter cation replacement as electrode material in a full cell setup of a potassium ion capacitor
Source: Royal Society of Chemistry journal article supplement (doi:10.1039/d3ra01746j), 2023-01-01
Supplement: d3ra01746j1.pdf [file d3ra01746j1.pdf]

## Supplementary Material

### 1. Differential thermogravimetry (DTG)

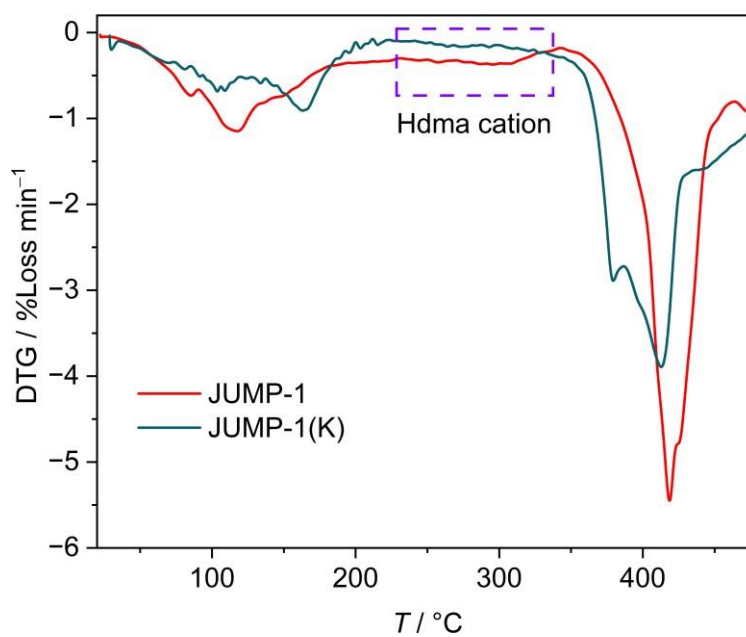

Fig. S1: DTG of the as-synthesized JUMP-1 and the potassium-exchanged JUMP 1(K) samples. Rectangular area marked with broken lines highlights the temperature range of the decomposition of the dimethylammonium (Hdma) cations indicative for their presence/absence in the framework.

## 2. X-ray Powder Diffraction

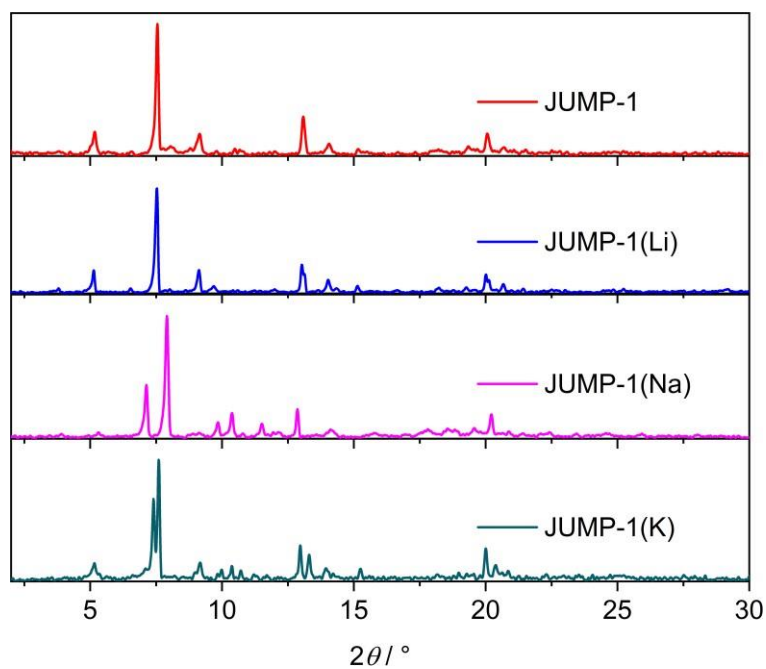

Fig. S2: Comparison of the powder X-ray diffraction (PXRD) patterns for the samples of the as-synthesized JUMP-1, lithium-exchanged JUMP-1(Li), sodium-exchanged JUMP-1(Na), and potassium-exchanged JUMP-1(K). Data for JUMP-1(Li) and JUMP-1(Na) are taken from the reference: O. Akintola, P. Gerlach, C. T. Plass, A. Balducci, W. Plass, *Front. Chem.*, 2022, **10**, 836325.

### 3. Sorption studies

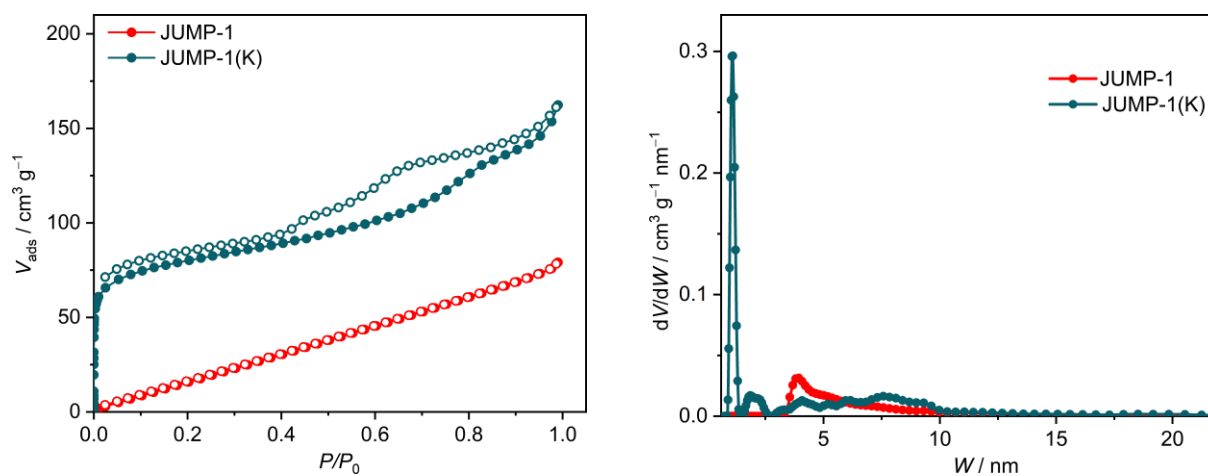

Fig. S3: Argon sorption isotherm of JUMP-1 and JUMP-1(K) (left). Pore distribution plots obtained from fitting its adsorption isotherms to NLDFT kernel (right).

Table S1: Summary of sorption data derived from argon sorption isotherms of the as-synthesized JUMP-1 and the potassium-exchanged JUMP-1(K) samples

|                                                   | JUMP-1 <sup>†</sup> | JUMP-1(K) |
|---------------------------------------------------|---------------------|-----------|
| $\alpha$ BET ( $\text{m}^2 \cdot \text{g}^{-1}$ ) | 100                 | 258       |
| Pore volume ( $\text{cm}^3/\text{g}$ )            | 0.10                | 0.21      |
| Modal pore width (nm)                             | 3.9                 | 1.10      |
| Mean pore width (nm)                              | 3.9                 | 3.20      |

<sup>†</sup>Data taken from the reference: O. Akintola, P. Gerlach, C. T. Plass, A. Balducci, W. Plass, *Front. Chem.*, 2022, **10**, 836325.

Table S2: Consistency criteria for calculating BET surface areas for as-synthesized JUMK-1 and the potassium-exchanged JUMP-1(K) samples

|                                        | JUMP-1 <sup>†</sup> | JUMP-1(K)   |
|----------------------------------------|---------------------|-------------|
| $P/P_0$ range                          | 0.20–0.35           | 0.005–0.079 |
| $C$                                    | 3.8                 | 828.9       |
| $V_m$ ( $\text{cm}^3/\text{g}$ )       | 25.9                | 67.7        |
| $(\sqrt{C} + 1)^{-1}$                  | 0.34                | 0.034       |
| $P/P_0(V_m)$                           | 0.34                | 0.038       |
| $\alpha$ BET ( $\text{m}^2/\text{g}$ ) | 100                 | 258         |
| $R$                                    | 0.999               | 0.9999      |

<sup>†</sup>Data taken from the reference: O. Akintola, P. Gerlach, C. T. Plass, A. Balducci, W. Plass, *Front. Chem.*, 2022, **10**, 836325.

#### 4. SEM Images

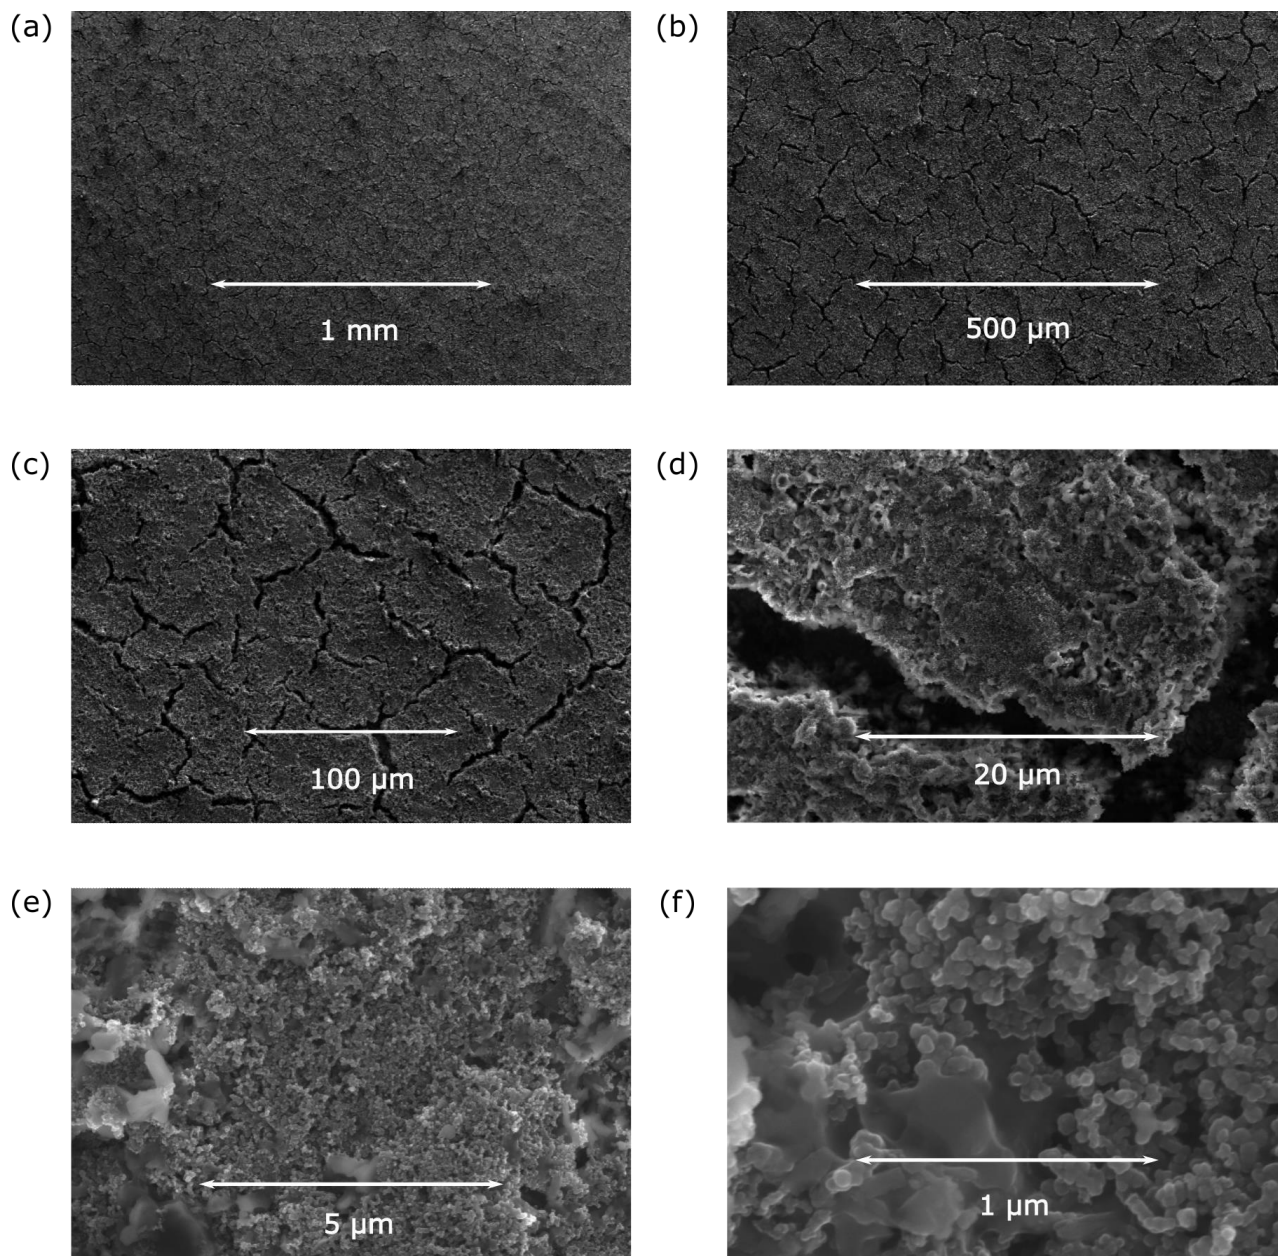

Fig. S4: SEM Images of JUMP-1 prior to electrochemical cycling.

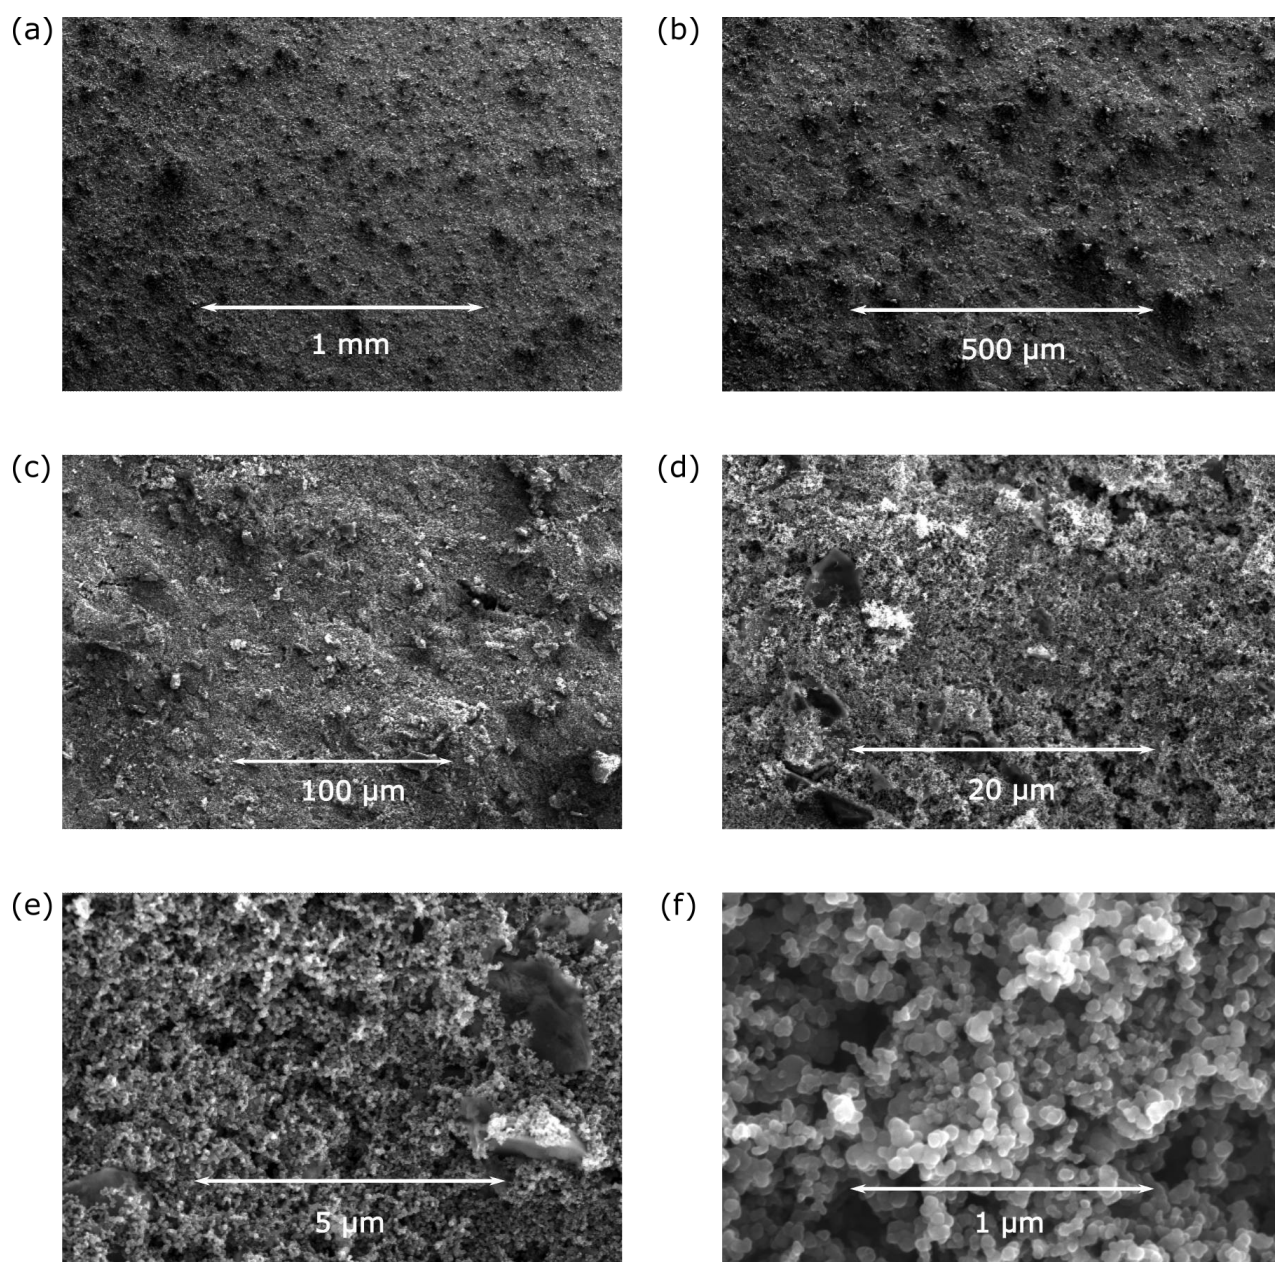

Fig. S5: SEM Images of JUMP-1(K) prior to electrochemical cycling.

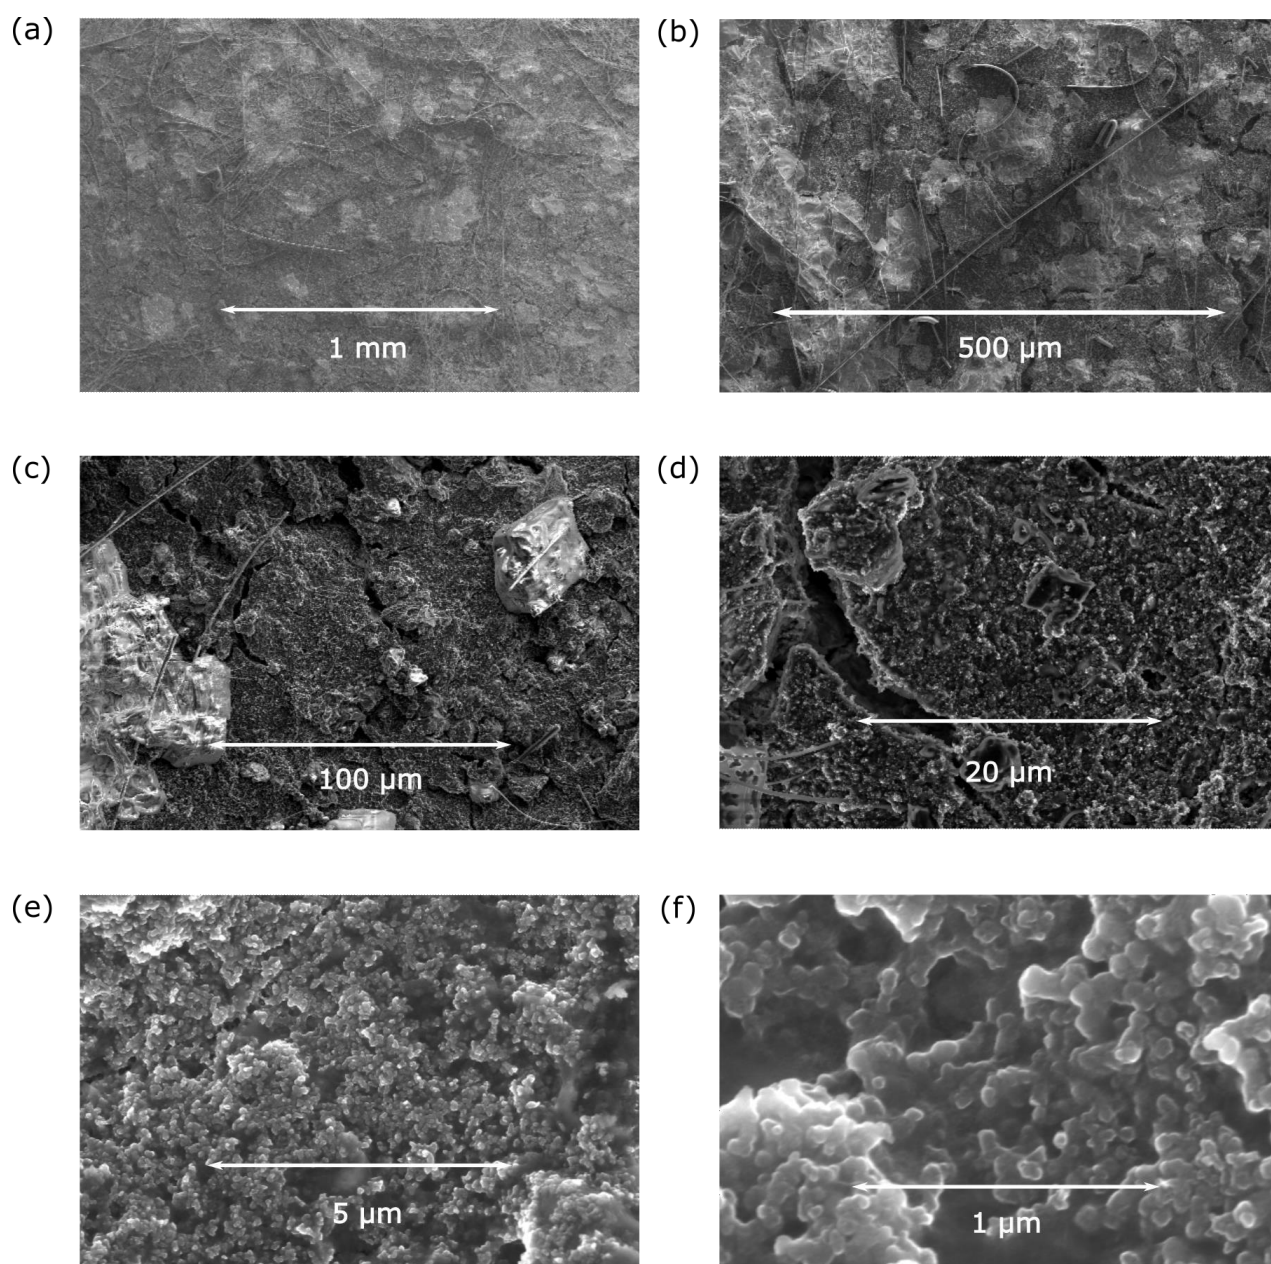

Fig. S6: SEM Images of JUMP-1 after electrochemical cycling.



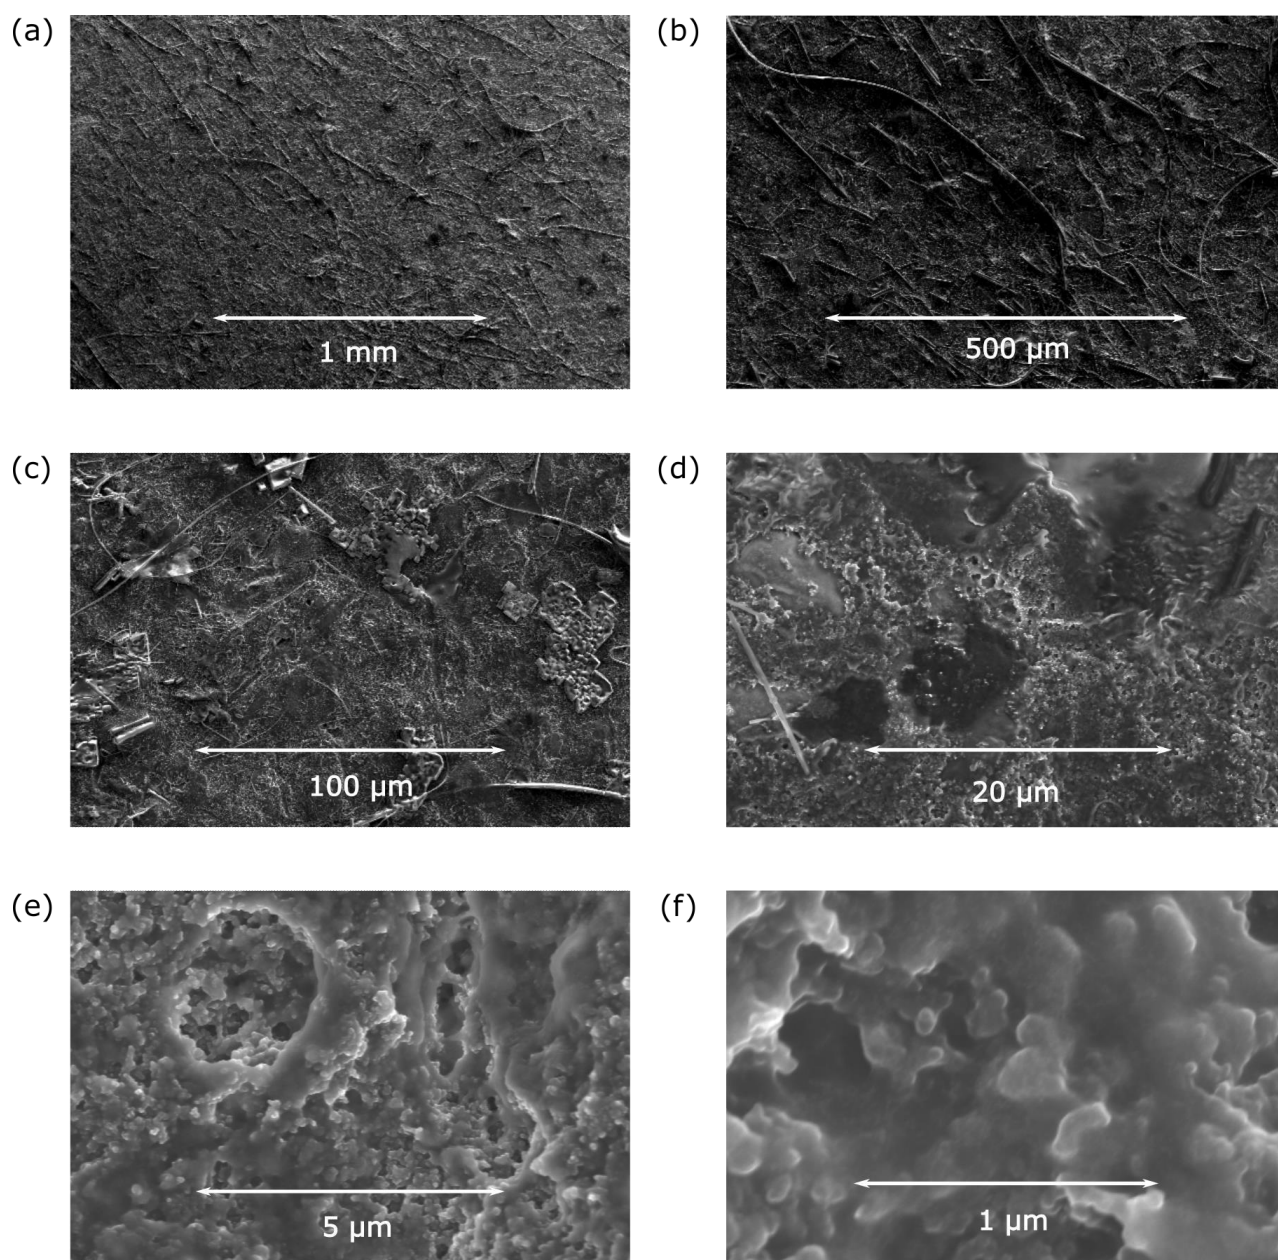

Fig. S7: SEM images acquired for JUMP-1(K) after electrochemical cycling.

5. Electron Dispersive X-ray Spectroscopy (EDXS) Mapping images

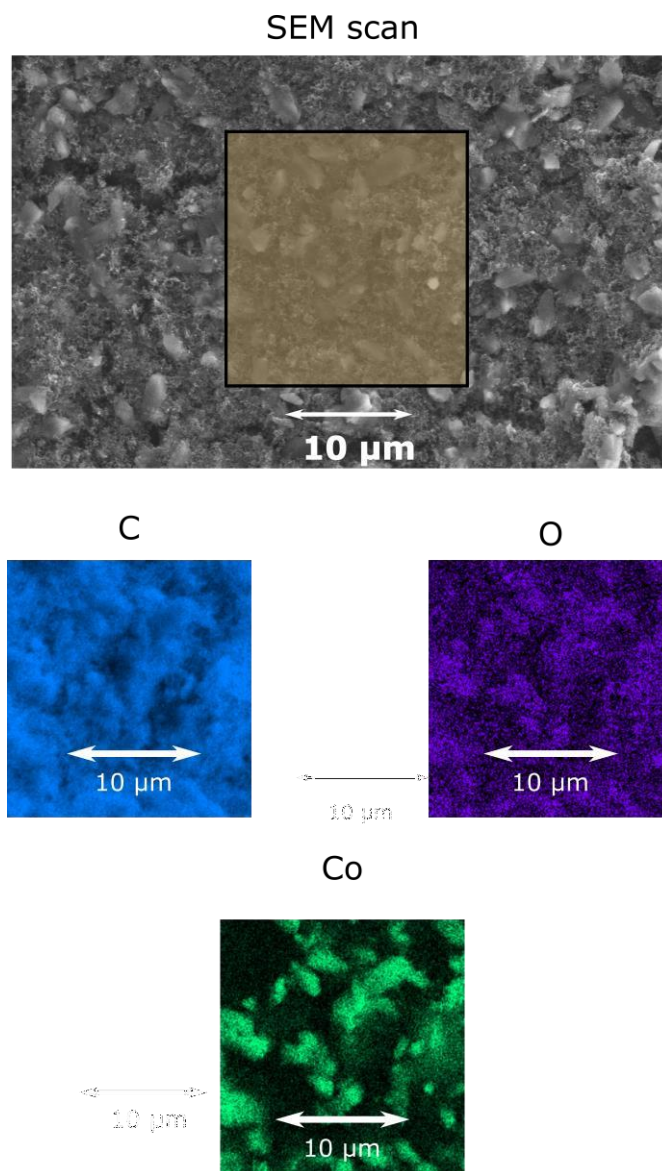

Fig. S8: EDXS intensity maps for JUMP-1 prior to electrochemical cycling at lower magnification.



SEM scan

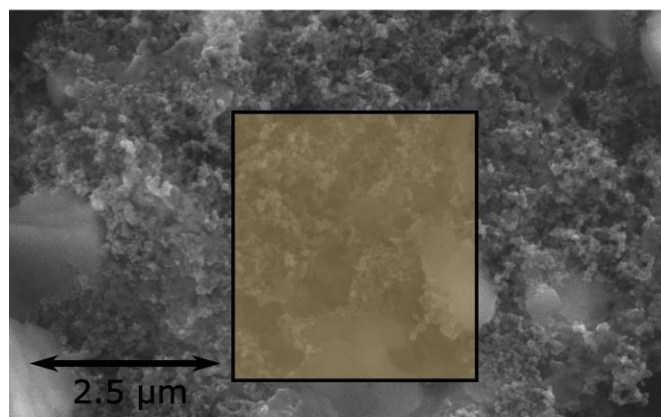

C

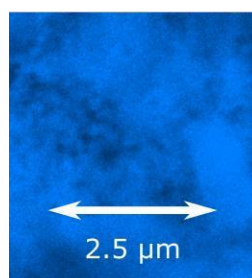

O

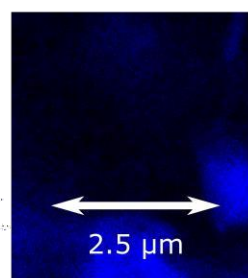

Co

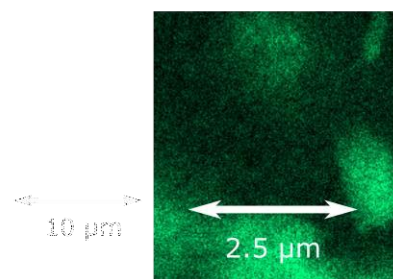

Fig. S9: EDXS intensity maps for JUMP-1 prior to electrochemical cycling at higher magnification.

SEM scan

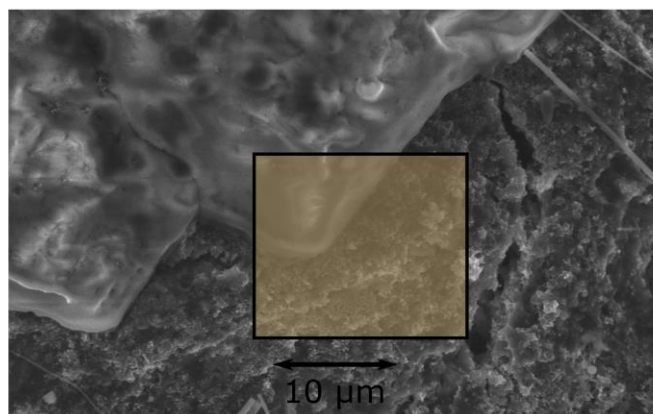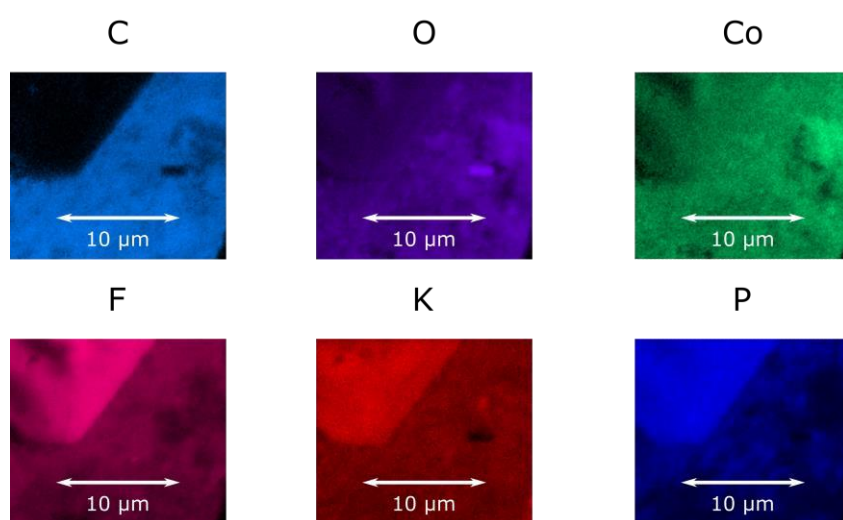

Fig. S10: EDXS intensity maps for JUMP-1 after electrochemical cycling at lower magnification.

SEM scan

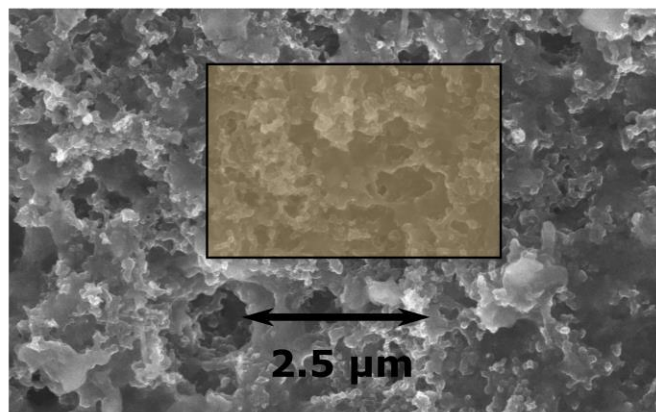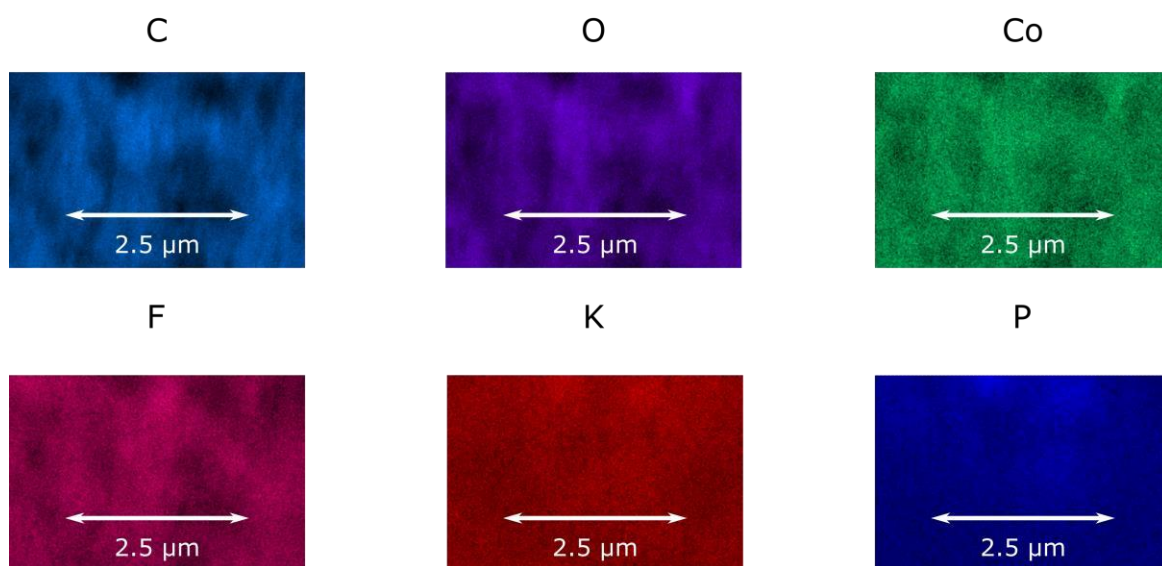

Fig. S11: EDXS intensity maps for JUMP-1 after electrochemical cycling at higher magnification.

SEM scan

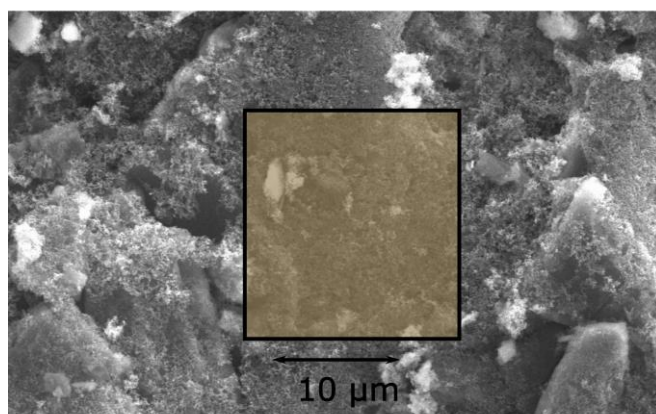

C

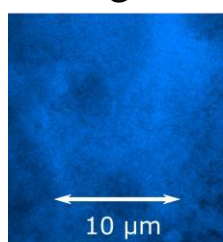

O

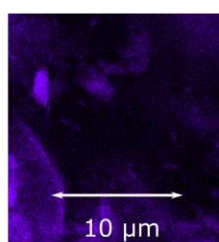

Co

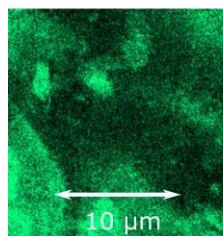

K

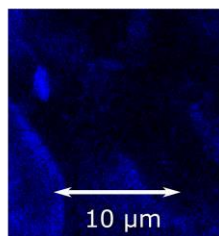

Fig. S12: EDXS intensity maps for JUMP-1(K) prior to electrochemical cycling at low magnification.

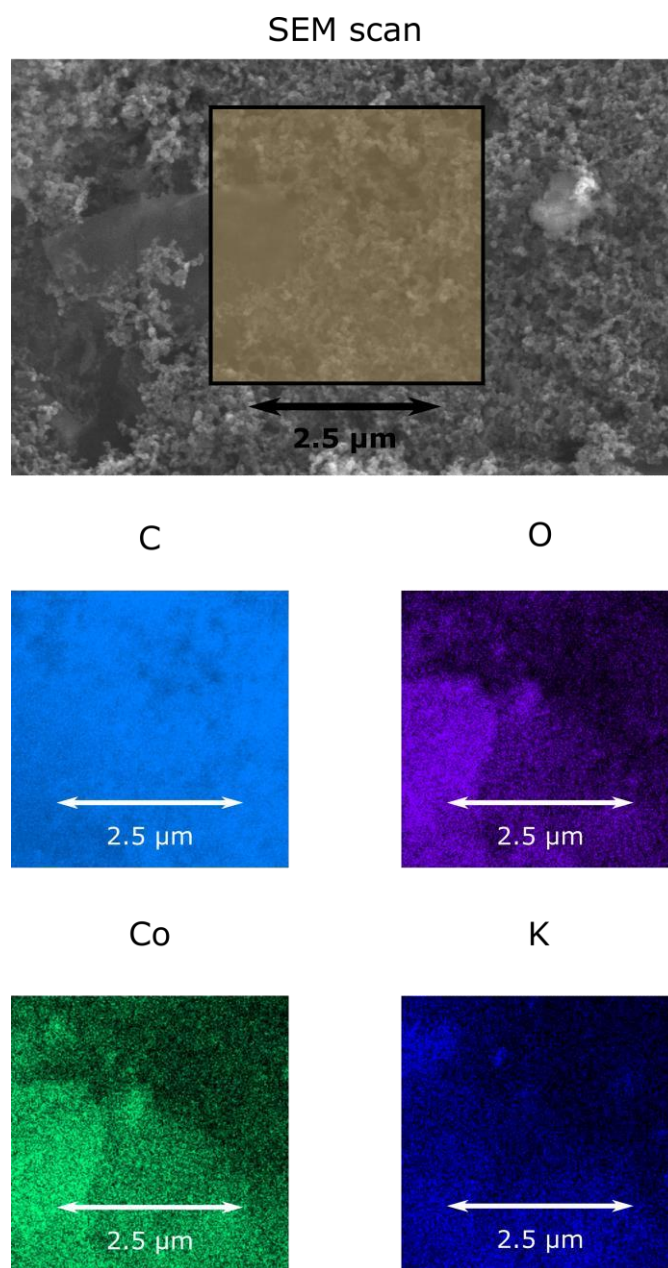

Fig. S13: EDXS intensity maps for JUMP-1(K) prior to electrochemical cycling at higher magnification.



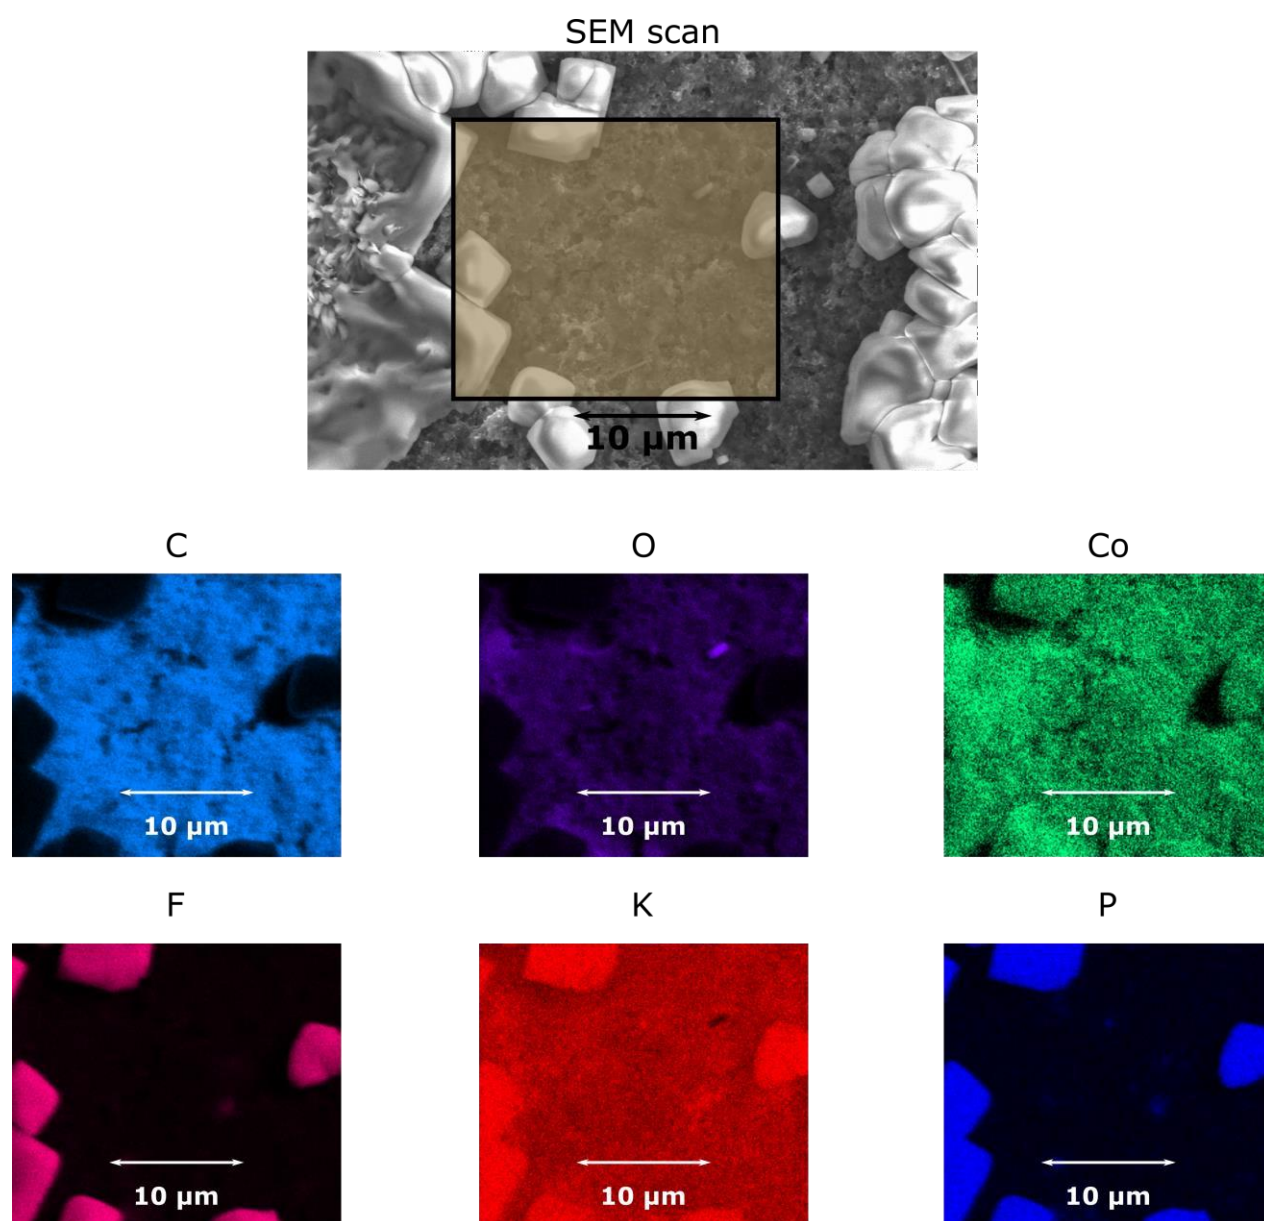

Fig. S14: EDXS intensity maps for JUMP-1(K) after electrochemical cycling at low magnification.



SEM scan

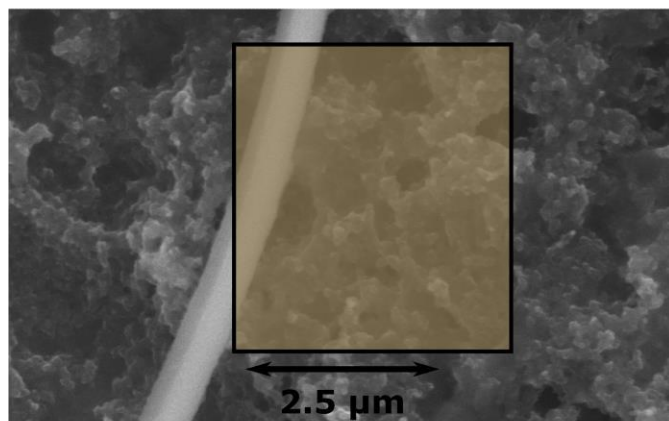

C

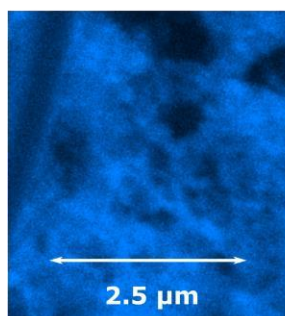

O

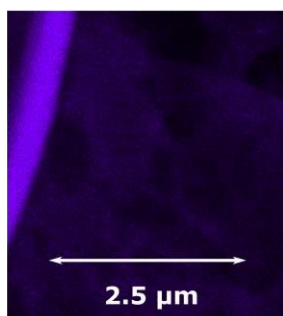

Co

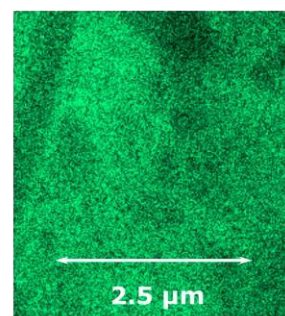

F

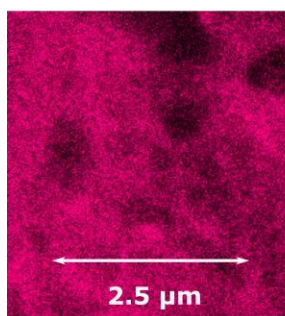

K

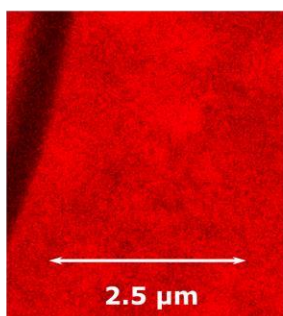

P

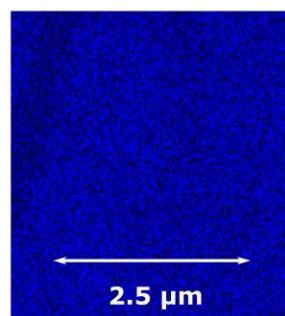

Fig. S15: EDXS intensity maps for JUMP-1(K) after electrochemical cycling at higher magnification.
